## 1 Title

2 Mendelian randomisation analyses of eosinophils and other blood cell types in relation to lung  
3 function and disease.

## 4 Authors

5 Anna L Guyatt,<sup>1\*</sup> Catherine John,<sup>1</sup> Alexander T Williams,<sup>1</sup> Nick Shrine,<sup>1</sup> Nicola Reeve,<sup>1</sup> SpiroMeta  
6 consortium, Ian P Hall,<sup>2</sup> Louise V Wain,<sup>1,3</sup> Nuala A Sheehan,<sup>1</sup> Frank Dudbridge,<sup>1</sup> Martin D Tobin<sup>\*1,3</sup>

## 7 Affiliations

- 8 1. Department of Health Sciences, University of Leicester, Leicester, UK
- 9 2. Division of Respiratory Medicine and NIHR-Nottingham Biomedical Research Centre,  
10 University of Nottingham, Nottingham, UK
- 11 3. National Institute for Health Research, Leicester Respiratory Biomedical Research Centre,  
12 Glenfield Hospital, Leicester, UK

## 14 Corresponding author statement

15 \* = Corresponding Authors.

16 Corresponding author emails: [anna.guyatt@leicester.ac.uk](mailto:anna.guyatt@leicester.ac.uk) (Anna L Guyatt) [mt47@le.ac.uk](mailto:mt47@le.ac.uk) (Martin D  
17 Tobin)

## 18 Abstract

19 **Background:** Eosinophils are granulocytes associated with airway inflammation in respiratory  
20 disease. Eosinophil production and survival is controlled by interleukin-5: anti-interleukin-5 agents  
21 reduce asthma and COPD exacerbation frequency, and response correlates with baseline eosinophil  
22 counts. However, causal relationships between eosinophils and other respiratory phenotypes are  
23 less studied.

24 **Methods:** We investigated causality between eosinophils and: lung function, acute exacerbations of  
25 COPD (AECOPD), asthma-COPD overlap (ACO), moderate-to-severe asthma, and respiratory  
26 infections. We performed Mendelian randomization (MR) using 151 genetic variants from genome-  
27 wide association studies of blood eosinophil counts in UK Biobank/INTERVAL, and respiratory data  
28 from UK Biobank, using MR methods relying on different assumptions for validity. Multivariable MR  
29 using eight blood cell type exposures was performed for outcomes showing evidence of causation by  
30 eosinophils.

31 **Findings:** There was evidence that higher eosinophils reduce FEV<sub>1</sub>/FVC and FEV<sub>1</sub> (weighted median  
32 estimator, SD change FEV<sub>1</sub>/FVC per SD eosinophils: -0.054 [95%CI -0.078,-0.029]). There was also  
33 evidence that eosinophils cause ACO (weighted median OR 1.44 [95%CI 1.19,1.74]), and asthma  
34 (weighted median OR 1.50 [95%CI 1.23,1.83]). Multivariable MR for FEV<sub>1</sub>/FVC, FEV<sub>1</sub>, ACO and asthma  
35 suggested that eosinophils were the cell type with the most important effect. Causal estimates of  
36 individual variants were heterogeneous, which may arise from pleiotropy.

37 **Interpretation:** We found evidence that eosinophils reduce lung function, and increase ACO and  
38 asthma risk, on average over the set of genetic variants studied. Eosinophils appear to be causal  
39 determinants of fixed airflow obstruction among individuals with features of both asthma and COPD.

40 **Funding:** Wellcome, BHF, MRC, BBSRC CASE studentship with GSK, GSK/BLF.

## 41 **Research in Context**

### 42 **Evidence before this study**

43 High eosinophils are observed in some individuals with asthma and COPD. Anti-IL5 and anti-IL5R  
44 drugs, such as mepolizumab and benralizumab, respectively, are currently licensed for treatment of  
45 severe eosinophilic asthma, and response correlates with baseline eosinophil levels. Clinical trials of  
46 anti-IL5 agents in COPD have reported reductions in blood and sputum eosinophil counts, but not  
47 reproducible reductions in COPD exacerbations, and any clinical improvement in COPD has been  
48 hypothesised to be smaller than that in asthma, and similarly related to the degree of eosinophilic  
49 inflammation.

### 50 **Added value of this study**

51 We performed Mendelian randomization (MR) analyses, using genetic variants that predict blood  
52 cell counts, to investigate causation between eosinophils and several quantitative lung function  
53 traits and clinical respiratory outcomes, encompassing both fixed and reversible airflow obstruction.  
54 Where there was evidence of causation by eosinophils, we explored whether other blood cell types  
55 may have contributed to this association, since blood cells counts are correlated. Overall, our aim  
56 was to provide a comprehensive assessment of the causal role of blood eosinophil counts in  
57 respiratory health and disease.

### 58 **Implications of all available evidence**

59 Although clinical trials of anti-IL5 agents have not directly tested the causal role of eosinophils in  
60 asthma and COPD, they are hypothesised to act via a reduction in eosinophil counts. We found  
61 evidence for causality of eosinophils on FEV<sub>1</sub> and FEV<sub>1</sub>/FVC (used in the diagnosis of COPD), on  
62 asthma-COPD overlap, and on asthma. We did not find evidence for eosinophils causing COPD  
63 exacerbations, but cannot rule out a small effect. Whilst the average effect of lowering eosinophils is  
64 to improve certain respiratory phenotypes we noted heterogeneity in our causal estimates from  
65 individual genetic variants, suggesting pleiotropic effects of SNPs affecting eosinophil levels. Taken  
66 together with prior evidence, our findings suggest that clinical trials of eosinophil lowering agents  
67 are warranted in patients with history of both asthma and COPD.

## 68 Introduction

69 Eosinophils are proinflammatory granulocytes associated with symptom severity and exacerbation  
70 frequency in patients with asthma and chronic obstructive pulmonary disease (COPD).<sup>2-4</sup> The degree  
71 of eosinophilia in these obstructive lung diseases is variable: whilst eosinophil inflammation brought  
72 about by allergic sensitisation has been considered characteristic of asthma, not all patients with  
73 asthma have eosinophilia.<sup>2,5</sup> Moreover, whilst airway inflammation in COPD is typically mediated by  
74 neutrophils, a subset of individuals with COPD have raised eosinophil counts.<sup>2,6</sup>

75 The production and survival of eosinophils is regulated by interleukin-5 (IL-5), and anti-IL5 therapies  
76 (e.g. mepolizumab, and the anti-IL5RA agent, benralizumab) are now licensed in many countries for  
77 the treatment of severe eosinophilic asthma.<sup>7-13</sup> The decision to treat asthma with these drugs is  
78 currently based upon blood eosinophil count,<sup>2</sup> since post-hoc analyses of clinical trials stratified by  
79 eosinophil levels have shown increased efficacy of mepolizumab for treating severe asthma in those  
80 with higher baseline eosinophils.<sup>3</sup> Results from Mendelian randomization (MR) analyses have also  
81 provided evidence for a causal role of eosinophils in asthma.<sup>14</sup> MR analyses use genetic variants as  
82 instrumental variables (IVs) to investigate causality between exposure and outcome, and under  
83 certain assumptions may obviate some of the problems of traditional observational epidemiology  
84 (reverse causation and confounding), permitting causal inference.

85 In addition to asthma, blood eosinophil counts are associated with quantitative measures of lung  
86 function in healthy populations (i.e. including individuals without asthma).<sup>15</sup> However, causality of  
87 these associations has yet to be established, with the only previous MR of lung function being of  
88 small sample size, with imprecise effect estimates precluding confident inference.<sup>16</sup> Moreover,  
89 causal effects of eosinophils on other respiratory phenotypes, such as asthma-COPD overlap (ACO),  
90 and respiratory infections are yet to be investigated. Diagnosis of COPD is made by spirometry if the  
91 ratio of the forced expiratory volume in one second ( $FEV_1$ ) to the forced vital capacity (FVC),  
92  $FEV_1/FVC$ , is  $<0.7$ , with airflow obstruction being graded according to predicted values of  $FEV_1$ .  
93 Therefore, studying the role of eosinophils in determining quantitative lung function (i.e. lung  
94 function measured as continuous traits) is a powerful way of understanding their role in the  
95 development of fixed airflow obstruction such as is observed in COPD.<sup>17,18</sup> Understanding the causal  
96 relationship between eosinophils and fixed airflow obstruction is particularly pertinent given recent  
97 interest in the potential use of mepolizumab in COPD.<sup>10-13</sup>

98 We undertook two-sample MR analyses using summary-level genome-wide association study  
99 (GWAS) data to assess causality between eosinophils and respiratory traits and conditions  
100 encompassing fixed and reversible airflow obstruction, using genetic variants associated with blood

101 eosinophil counts in the largest GWAS to date as IVs.<sup>14</sup> First, we investigated a causal effect of  
102 eosinophils on three quantitative lung function traits measured by spirometry, and four clinical  
103 respiratory phenotypes (moderate-to-severe asthma, acute exacerbations of COPD [AECOPD], ACO,  
104 and respiratory infections). We used three MR approaches that rely on different assumptions for  
105 validity, and followed-up traits showing evidence of causality to assess whether the instrumental  
106 variables affected lung function purely via eosinophil counts and not via other blood cell types.  
107 Overall, our aim was to provide a comprehensive assessment of the causal role of blood eosinophil  
108 counts in relation to respiratory health and disease.

## 109 **Methods**

110 We assessed causal associations between eosinophils and other blood cell counts in relation to  
111 multiple respiratory outcomes, using MR.<sup>1,19</sup> Briefly, MR involves using genetic variants (here single-  
112 nucleotide polymorphisms, SNPs), as instrumental variables (IVs) for an exposure of interest, in this  
113 case eosinophil counts. This is done by comparing the magnitude of the effect of the SNPs on the  
114 outcome to the effect of the SNPs on the exposure.<sup>1,19</sup> All analyses reported here are two-sample

### **Box 1 Mendelian randomization: core assumptions**

#### **Assumptions**

Mendelian randomization may be used to test for causality between an exposure (e.g. eosinophils) and outcome (e.g. FEV<sub>1</sub>/FVC), if the following core assumptions hold:

- i) the genetic variation (single nucleotide polymorphisms in this work) used as instrumental variables (IVs) are associated with the exposure of interest;
- ii) the genetic variants are not associated with unobserved confounders of the exposure-outcome association (short dashed arrow). Genetic variants are allocated randomly at conception (Mendel's law of independent assortment) and so typically should not be associated with these confounding variables;
- iii) association between the genetic variants and the outcome is via the exposure, and not via an alternate pathway (i.e. there is no 'horizontal pleiotropy', see long dashed arrow). Whilst difficult to verify, reassurance that this assumption holds can be provided using biological knowledge of how the SNP functions, and by checking whether multiple MR methods, each relying on different assumptions for validity, give consistent results (known as triangulation).<sup>1</sup>

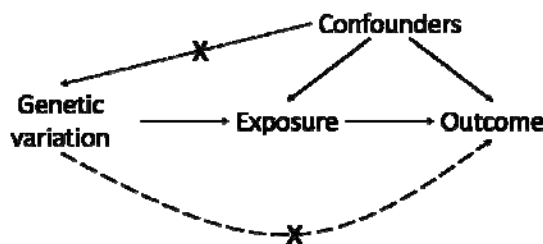

115 MR analyses, since SNP-exposure and SNP-outcome associations were extracted from different (yet  
116 overlapping<sup>20</sup>) samples. The core assumptions of MR for inferring causality between an exposure and  
117 outcome are described in **Box 1**. Additional assumptions required for accurate point estimation are  
118 discussed in the **Extended Methods**, and elsewhere.<sup>21</sup>

119 All GWAS datasets analysed included participants from UK Biobank,<sup>22</sup> incorporating other studies  
120 where available. All GWAS included were of individuals of European ancestry. Datasets are  
121 summarised here, and descriptions of covariate adjustments, and exposure-outcome GWAS overlap  
122 are given in the **Extended Methods**.

### 123 **Exposure GWAS data sets (blood cell parameters)**

124 We used summary-level data from a previously published GWAS of blood cell counts<sup>14</sup> in the initial  
125 release of UK Biobank genetic data (around one third of all participants), plus the INTERVAL study  
126 (eosinophil GWAS N=172,275, see **Extended Methods**).<sup>14</sup> These included counts of eosinophils,  
127 basophils, neutrophils, monocytes, lymphocytes, platelets, red blood cells and reticulocytes.

### 128 **Outcome GWAS data sets (respiratory outcomes)**

#### 129 *Quantitative lung function GWASs*

130 We used published summary-level data from three GWAS of quantitative lung function (FEV<sub>1</sub>, FVC  
131 and FEV<sub>1</sub>/FVC), undertaken in 400,102 individuals.<sup>18</sup>

#### 132 *Clinical disease GWAS*

##### 133 *Moderate-to-severe asthma*

134 We used a published GWAS of moderate-to-severe asthma comprising 5,135 cases and 25,675  
135 controls, sampled from the initial release of UK Biobank, supplemented with external cases.<sup>23</sup>

##### 136 *Acute exacerbations of COPD*

137 We defined acute exacerbations of COPD (AECOPD) in UK Biobank; the eligible sample was restricted  
138 to individuals with FEV<sub>1</sub>/FVC < 0.7. From this subset, exacerbation cases (N=2,771) had an ICD-10 code  
139 for AECOPD or a lower respiratory tract infection in the hospital episode statistics data provided by  
140 UK Biobank (**Supplementary Table 1**). Controls (N=42,052) were people with COPD without a  
141 recorded ICD-10 AECOPD code. Associations were adjusted for age (at recruitment), age<sup>2</sup>, sex,  
142 smoking status (ever/never), genotyping array and 10 ancestry principal components.

##### 143 *Asthma-COPD overlap (ACO)*

144 We defined ACO cases in UK Biobank (N=8,068) as individuals with a self-report of a doctor diagnosis  
145 of asthma, and both FEV<sub>1</sub>/FVC < 0.7 and FEV<sub>1</sub> < 80% predicted at any study visit. Controls (N=40,360)  
146 were selected in a ratio of approximately five controls to one case from participants reporting no  
147 asthma or COPD, and with FEV<sub>1</sub> > 80% predicted and FEV<sub>1</sub>/FVC > 0.7. Associations were adjusted for  
148 age (at recruitment), sex, smoking status, and 10 ancestry principal components.

## 149 *Respiratory infections*

150 We defined respiratory tract infections requiring hospital admission in UK Biobank, using a wide  
151 range of ICD-10 codes (**Supplementary Table 2**). Cases were individuals with one or more admission  
152 for respiratory infections (N=19,459). Controls had no admissions for respiratory infections and were  
153 selected in a ratio of approximately five controls to one case (n=101,438 after exclusions).  
154 Associations were adjusted for age (at recruitment), age<sup>2</sup>, sex, smoking status, genotyping array, and  
155 10 ancestry principal components.

## 156 **Statistical methods**

### 157 *Univariable MR analyses of eosinophils and all respiratory traits and diseases*

158 We performed seven separate MR analyses of eosinophils on all outcomes, including three  
159 quantitative lung function traits (FEV<sub>1</sub>, FVC, and FEV<sub>1</sub>/FVC); and four clinical disease phenotypes  
160 (asthma, AECOPD, ACO and respiratory infections) utilising genetic IVs selected from<sup>18</sup>. The selection  
161 of genetic IVs and the harmonisation of SNP-exposure and SNP-outcome datasets is detailed in the  
162 **Extended Methods**. A total of 151 eosinophil IVs were used for this analysis. The primary analysis  
163 used the inverse-variance weighted (IVW) MR method, and we checked sensitivity to condition (iii)  
164 described in **Box 1** using sensitivity analyses, conducted using MR-Egger regression,<sup>24</sup> and the  
165 weighted median estimator<sup>25</sup> (see **Extended Methods** for details, including the different  
166 assumptions that the methods rely upon for validity). Further sensitivity analyses: i) restricted to  
167 non-UKB FEV<sub>1</sub>/FVC GWAS data, to assess sensitivity to sample overlap, and ii) restricted to FEV<sub>1</sub>/FVC  
168 GWAS data in UKB, excluding individuals with asthma.

### 169 *Multivariable MR analyses of multiple blood cell types and respiratory outcomes*

170 Since SNPs affecting eosinophils also affect other blood count types,<sup>14</sup> we used multivariable MR in  
171 order to estimate the influence of multiple cell types on respiratory outcomes, after conditioning on  
172 the effects of the SNPs on other cell types. Multivariable MR analyses were run for respiratory  
173 outcomes that showed evidence of eosinophil causation in the IVW MR analyses above, and that had  
174 broadly consistent effect estimates in the weighted median and MR-Egger analyses. We also  
175 performed an analysis of FEV<sub>1</sub>/FVC in UKB (excluding asthma cases).

176 There were 1166 SNPs associated with at least one of eight blood count traits reported by Astle *et*  
177 *al*<sup>14</sup> at a genome-wide threshold. SNPs were LD clumped, and effect sizes were extracted from each  
178 blood cell trait GWAS, and from the outcome GWASs. Effects for 318 clumped SNPs were  
179 successfully harmonised, i.e. so effect sizes for the SNP-exposure and SNP-outcome effects  
180 corresponded to the same allele (**Supplementary Table 3, Extended Methods**).

181 To implement multivariable MR, we used the `mv_multiple()` function of the ‘TwoSampleMR’ R  
182 package.<sup>26-28</sup>

183 This analysis had two aims: i) to further investigate the possibility of horizontal pleiotropy affecting  
184 the results of the eosinophil MR; and ii) to establish whether any other cell types besides eosinophils  
185 could affect the respiratory outcomes studied.



## 186 Results

### 187 Univariable MR analyses of eosinophils and respiratory outcomes

188 There were 151 SNPs available for the univariable MR analyses, which were used in analyses of three  
189 quantitative lung function traits (FEV<sub>1</sub>, FVC, and FEV<sub>1</sub>/FVC), and four respiratory disease phenotypes  
190 (moderate-to-severe asthma, AECOPD, ACO and respiratory infections). Details of the selection of  
191 SNP IVs is described in **Figure 1**.

192 **Figure 1** Selection of SNPs for univariable MR analyses of eosinophils and respiratory outcomes

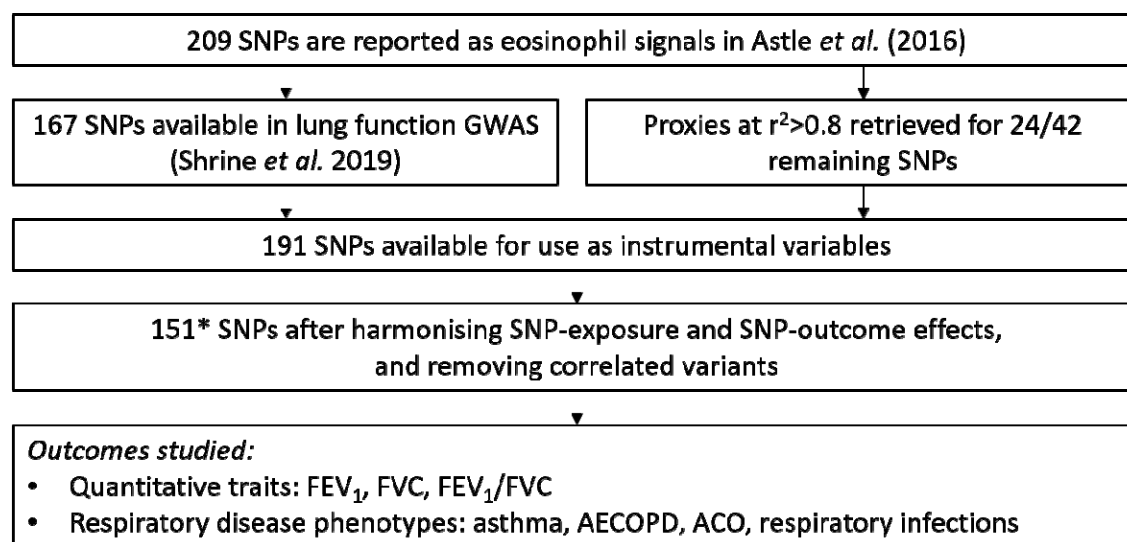

193  
194

### 195 Legend

196 Flowchart describing the analysis workflow for initial MR analyses of eosinophils. Of 209 SNPs  
197 associated with eosinophil count, 167 were available in lung function GWASs (missingness is due to  
198 some SpiroMeta studies not being imputed to the HRC panel).<sup>18</sup> LD proxies at  $r^2 > 0.8$  were retrieved  
199 for 24/42 missing variants. Of the resulting 191 SNPs, 188 were successfully harmonised between the  
200 SNP-eosinophil and SNP-lung function data sets, and 151\* remained after LD clumping at an  $r^2$   
201 threshold of 0.01. These 151 SNPs were used in analyses. \*One SNP, rs9974367, was missing in the  
202 moderate-severe asthma GWAS. AECOPD=acute exacerbation of COPD; ACO=asthma-COPD overlap.

203 Results are presented in **Figure 2**. Amongst the quantitative lung function traits, there was strongest  
204 evidence for a causal effect of eosinophils on FEV<sub>1</sub>/FVC (SD change in FEV<sub>1</sub>/FVC per SD eosinophils,  
205 IVW estimate=-0.049 [95% CI: -0.079, -0.020]), with a smaller effect on FEV<sub>1</sub> (IVW estimate=-0.028  
206 [95% CI: -0.054, -0.003]). There was substantial heterogeneity of SNP-specific causal estimates for all

207 three traits, as evidenced by the large values of Cochran's Q statistic. However, heterogeneity was  
208 likely due to balanced pleiotropy, since weighted median estimates were consistent with the IVW  
209 estimates. Confidence intervals for the MR Egger estimates were broad, consistent with the low  
210 power of this method, but there was no evidence of unbalanced pleiotropy, as evidenced by the p-  
211 values for the intercept of the MR Egger intercept term. Scatterplots of SNP-outcome against SNP-  
212 exposure effects for the three quantitative outcomes are given in **Supplementary Figure 1**.

213 Amongst the respiratory disease phenotypes (also **Figure 2**), there was strong evidence for a causal  
214 effect of eosinophils on asthma (OR per SD eosinophil count, IVW method=2.46 [95% CI: 1.98, 3.06]),  
215 and ACO (IVW OR=1.86 [95% CI: 1.52, 2.27]). There was substantial heterogeneity of SNP-specific  
216 causal estimates for these two traits, and the weighted median estimates were smaller in magnitude  
217 than the IVW estimates (weighted median OR: 1.50 [95% CI: 1.23, 1.83] for asthma, and 1.44 [95%  
218 CI: 1.19, 1.74] for ACO). Whilst the confidence intervals for the MR Egger estimates were still broad,  
219 estimates were generally closer to the weighted median estimates, suggesting that the IVW  
220 estimates were inflated due to the presence of horizontal pleiotropy, particularly for asthma.  
221 Inflation for the asthma estimate is also more likely due to larger overlap between the SNP-exposure  
222 and SNP-outcome datasets for this analysis (see **Extended Methods**). Scatterplots of SNP-outcome  
223 against SNP-exposure effects for all four outcomes are given in **Supplementary Figure 2**, which  
224 clearly demonstrate the heterogeneity in causal effect estimates. Conversely, there was no evidence  
225 of association of eosinophil counts with AECOPD or respiratory infections. For both outcomes,  
226 confidence intervals for all three MR estimates included the null, and all estimates were close to the  
227 null.

228 See **Supplementary Table 4** for full results for all models.

#### 229 *Sensitivity analysis to assess the effects of sample overlap for quantitative lung function traits*

230 UK Biobank featured in all GWAS datasets used, albeit the blood cell count GWAS and asthma GWAS  
231 included only approximately one third of the UK Biobank genotype data.<sup>14</sup> Since we had access to  
232 data from the subset of the quantitative lung function GWASs that did not include UK Biobank, we  
233 conducted sensitivity analyses to assess for the effect of sample overlap (see **Extended Methods**).  
234 Results were generally consistent with the main results (e.g. SD change in FEV<sub>1</sub>/FVC per SD  
235 eosinophil count, IVW estimate=-0.041 [95% CI: -0.072, -0.009]; SD change FEV<sub>1</sub> per SD eosinophil  
236 count=-0.043 [95%CI -0.077,-0.010]) (**Supplementary Table 5**).

#### 237 *Sensitivity analysis to assess the effect on FEV<sub>1</sub>/FVC in individuals without asthma*

238 The causal effect of eosinophils on FEV<sub>1</sub>/FVC was recalculated using data from UK Biobank, excluding  
239 individuals with an asthma diagnosis. The effect size was attenuated compared to the main results,

240 and the 95% confidence interval overlapped the null: IVW -0.013 [95% CI: -0.041, 0.015] (see

241 **Supplementary Table 6**).

242 **Figure 2 MR analyses of eosinophils (exposure) on three quantitative lung function traits (top) and**  
 243 **four respiratory disease phenotypes (bottom), using 151 eosinophil-associated SNPs**

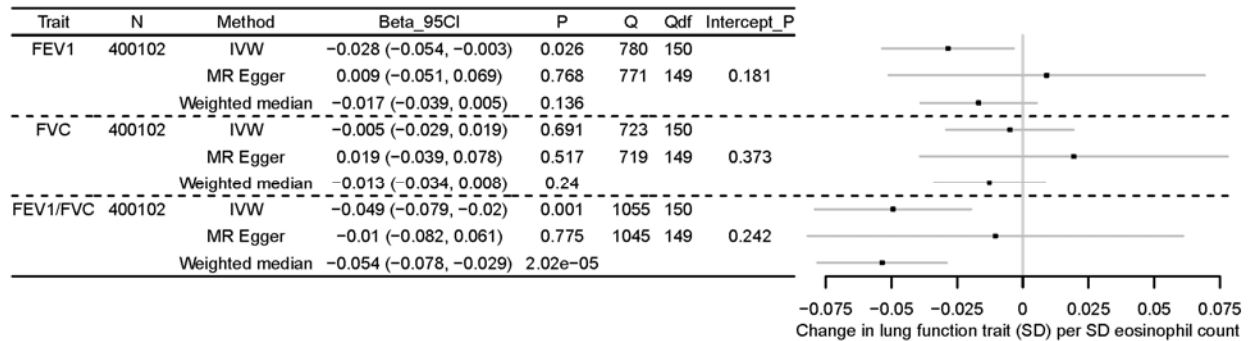

244  
 245

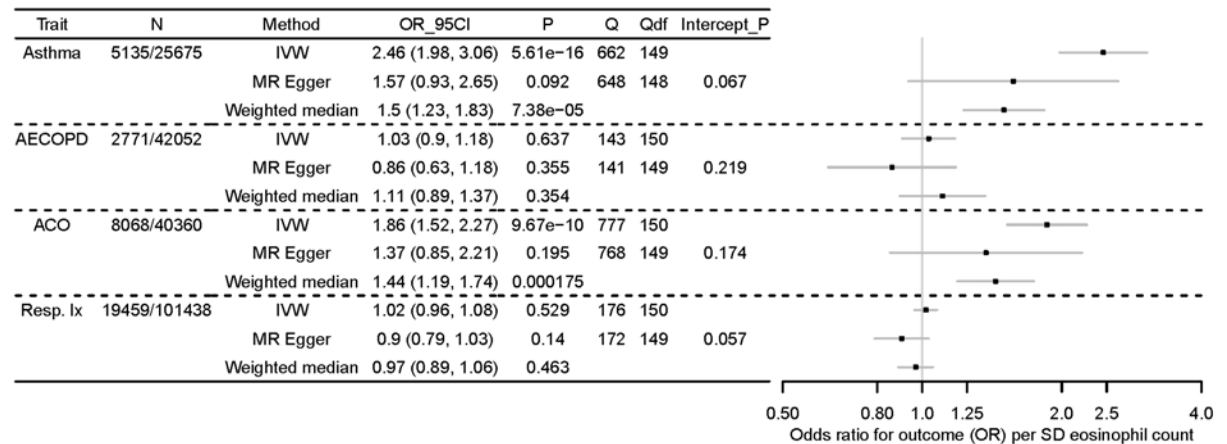

246  
 247

248 *Legend*

249 *Top: Results of MR analyses of eosinophil counts (exposure) on three quantitative lung function traits*  
 250 *(outcome), FEV<sub>1</sub>, FVC, and FEV<sub>1</sub>/FVC. A forest plot of three estimates for each traits is shown (IVW,*  
 251 *MR Egger, weighted median), along with the maximum sample size in the outcome GWAS (N), the*  
 252 *effect size in SD change in outcome trait per SD eosinophil count, and 95% confidence interval, values*  
 253 *for Cochran's Q statistic (Q) and the associated degrees of freedom (Q\_df), and the P-value for the*  
 254 *MR Egger intercept (Intercept\_P). Boxes of the forest plot represent effect sizes, whiskers are 95%*  
 255 *confidence intervals.*

256 *Bottom: Results of MR analyses of eosinophil counts (exposure) on four respiratory disease*  
 257 *phenotypes (outcome), moderate-to-severe asthma, acute exacerbations of COPD (AECOPD),*

258 *asthma-COPD overlap (ACO), and respiratory infection (Resp. Ix). A forest plot of three estimates for*  
259 *each traits is shown (IVW, MR Egger, weighted median), along with sample size in the outcome*  
260 *GWAS for cases and controls, respectively (N), the effect size as odds ratio (OR) per SD eosinophil*  
261 *count, and 95% confidence interval, values for Cochran's Q statistic (Q) and the associated degrees of*  
262 *freedom (Q\_df), and the P-value for the MR Egger intercept (Intercept\_P). Boxes of the forest plot*  
263 *represent odds ratios, whiskers are 95% confidence intervals. NB only 150/151 of the eosinophil SNPs*  
264 *were available in the moderate-to-severe asthma GWAS.*

## 265 **Multivariable MR analyses of blood cell counts and respiratory outcomes**

266 To further explore causality between blood cell parameters and FEV<sub>1</sub>, FEV<sub>1</sub>/FVC, moderate-to-severe  
267 asthma and ACO, we carried out multivariable MR analyses, using eight cell types as exposures  
268 (basophils, eosinophils, neutrophils, monocytes, lymphocytes, platelets, red blood cells and  
269 reticulocytes).

270 The selection of SNP IVs for multivariable MR is described in the **Methods**, and **Supplementary Table**  
271 **3**. Briefly, 1166 unique SNPs were associated with at least one of the eight cell types at  $p < 8.31 \times 10^{-9}$   
272 in Astle *et al.*, and were available in the outcome GWASs. After LD-clumping, 329 SNPs remained,  
273 and after harmonising SNP-exposure and SNP-outcome effects, 318 SNPs remained. Estimated  
274 variance explained ( $r^2$ ) and instrument strength (F-statistics) by cell-type are also given in  
275 **Supplementary Table 3**. We present these estimates as a guide of relative strength of sets of IVs, but  
276 do not intend for them to be interpreted as measures of absolute strength, given the likelihood of  
277 Winner's curse bias.<sup>20</sup>

278 Multivariable MR results for FEV<sub>1</sub> and FEV<sub>1</sub>/FVC are presented in **Figure 3**. Even after conditioning on  
279 the effects of the SNPs on other cell types, eosinophils reduced lung function as measured by  
280 FEV<sub>1</sub>/FVC (multivariable estimate, SD change in FEV<sub>1</sub>/FVC per SD eosinophils adjusted for other cell  
281 types: -0.065 [95% CI: -0.104, -0.026]). The eosinophil point estimate for FEV<sub>1</sub> was consistent with  
282 the univariable estimate (**Figure 2**), but results for eosinophils (-0.032 [95%CI: -0.068, 0.005]) and  
283 other cell types were consistent with the null. When asthma cases were excluded from SNP-  
284 FEV<sub>1</sub>/FVC results, the eosinophil estimate attenuated, and confidence intervals overlapped the null (-  
285 0.028 [95%CI: -0.069, 0.013]) consistent with the causal effect of eosinophils on lung function being  
286 of greater magnitude in people with a history of asthma (**Supplementary Figure 3**).

287 Results of the multivariable MR analysis for the two respiratory disease outcomes (ACO and asthma)  
288 are presented in **Figure 4**. There was an association of eosinophil count with both ACO (OR 1.95  
289 [95% CI: 1.57, 2.42]) and asthma [OR 2.90 [95% CI: 2.31, 3.65]], after adjusting for the effects of the  
290 SNPs on other cell types. Confidence intervals for other cell type estimates were consistent with the  
291 null effect of 1, with the exception of neutrophils for ACO.

292 **Figure 3 Multivariable MR analyses of eight cell types and FEV<sub>1</sub> and FEV<sub>1</sub>/FVC**

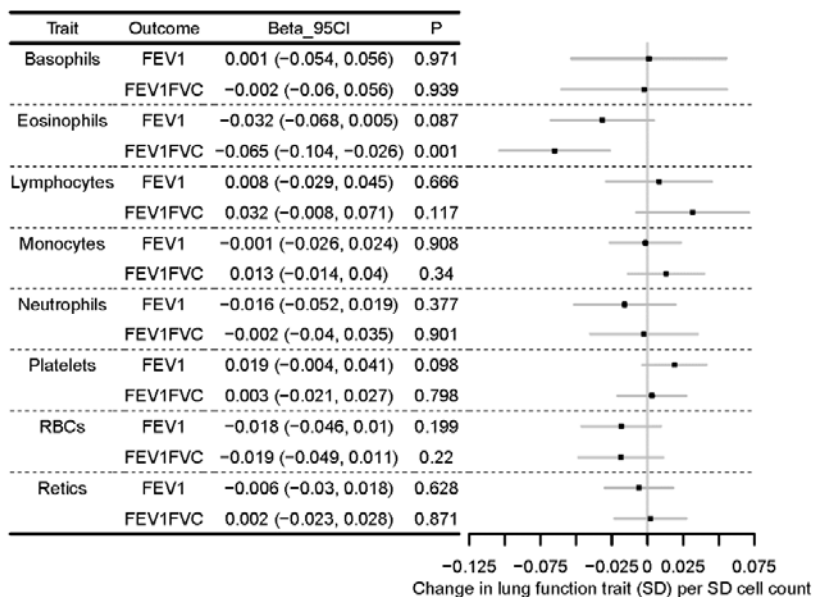

293

294 *Forest plot showing multivariable MR estimating the causal effect of multiple cell types on*  
 295 *quantitative lung function outcomes, after conditioning on the effects of the SNPs on other cell types.*  
 296 *Models were run for each of forced expiratory volume in 1 second (FEV<sub>1</sub>) and the ratio of FEV<sub>1</sub> to*  
 297 *forced vital capacity (FVC) separately, but effect sizes are shown next to one another for comparison.*  
 298 *Effect sizes (beta, 95% confidence interval, 95CI) are in SD change in lung function outcome per SD*  
 299 *cell count (adjusted for the effects of other cell types). Points of the forest plot represent effect size*  
 300 *estimate; whiskers are 95% confidence intervals.*

301

302

303 **Figure 4 Multivariable MR analyses of eight cell types and two respiratory disease outcomes, ACO**  
 304 **and asthma**

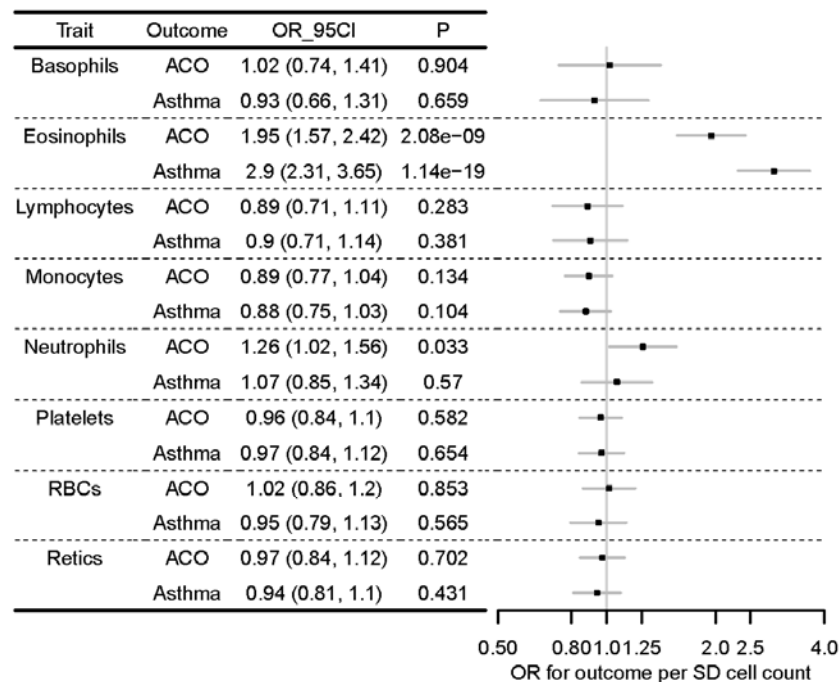

305

306 *Legend*

307 *Forest plot showing multivariable MR estimating the causal effect of multiple cell types on*  
 308 *respiratory disease outcomes, after conditioning on the effects of the SNPs on other cell types.*  
 309 *Models were run for each of ACO and asthma separately, but effect sizes are shown next to one*  
 310 *another for comparison. Odds ratios (OR, 95% confidence interval, 95CI) are per SD cell count*  
 311 *(adjusted for the effects of other cell types). Points of the forest plot represent odds ratios; whiskers*  
 312 *are 95% confidence intervals.*



## 313 Discussion

314 Using Mendelian randomization, we found evidence for a causal effect of eosinophils in determining  
315 FEV<sub>1</sub>/FVC, FEV<sub>1</sub>, ACO and asthma. For these four outcomes, we additionally performed multivariable  
316 MR to investigate the causal role of a broader range of eight blood cell types, and found that  
317 amongst these cell types eosinophils had the strongest evidence of an effect on the respiratory  
318 outcomes studied.

319 To our knowledge, this is the largest MR study of eosinophils in relation to lung function, and the  
320 first to investigate the relationship between eosinophils and AECOPD, ACO, and respiratory  
321 infections. Whilst terminology of ACO has changed over time, the recognition that asthma and COPD  
322 coexist in some patients has not changed,<sup>29</sup> and this is what our analysis aimed to capture.

323 A previous two-sample MR analysis of eosinophils in relation to asthma was undertaken by the  
324 authors of the cell count GWAS used to derive IVs in the current study; these authors used asthma  
325 GWAS data from the GABRIEL study.<sup>14</sup> Our results support their conclusion that eosinophils are  
326 causal determinants of asthma. We are aware of one other MR study of eosinophil counts in relation  
327 to asthma, COPD, FEV<sub>1</sub> and FEV<sub>1</sub>/FVC, conducted entirely within the LifeLines cohort (N=13,301, 5  
328 SNPs used as IVs).<sup>16</sup> In that study, confidence intervals for causal estimates of eosinophils were  
329 consistent with the null, albeit point estimates were consistent with a harmful effect for FEV<sub>1</sub>/FVC,  
330 asthma and COPD. Here, we used the largest eosinophil count GWAS to date (N=172,275)<sup>14</sup> to derive  
331 IVs, and found evidence for causality of eosinophils in reducing FEV<sub>1</sub>/FVC, the lung function trait in  
332 which impairment is the key feature of COPD diagnosis, and FEV<sub>1</sub>, the trait used to grade airflow  
333 limitation in COPD. We did not find strong evidence of a causal effect of eosinophils on FVC, despite  
334 observing negative point estimates. This is of interest because it is a reduction in FEV<sub>1</sub> (and therefore  
335 in FEV<sub>1</sub>/FVC) that is a hallmark of obstructive lung diseases, with effects on FVC being generally less  
336 prominent. Our sensitivity analyses highlighted a larger estimated causal effect of eosinophils on  
337 FEV<sub>1</sub>/FVC among individuals with a history of asthma, with an attenuation of effect size estimates  
338 seen when excluding this group. Together with the effect shown for ACO, our findings highlight the  
339 importance of eosinophils on lung function and airflow obstruction in people with a history of  
340 asthma.

341 Amongst the outcome traits showing evidence for causation by eosinophils, we observed substantial  
342 heterogeneity in causal estimates for individual SNPs, i.e. different causal effects on the outcome  
343 phenotypes may arise from different genetic variants influencing eosinophils. Accordingly, we  
344 compared MR methods that rely on differing assumptions for validity (**Box 1**). When comparing the  
345 IVW, MR-Egger and weighted median results, effect estimates for eosinophils on quantitative lung

346 function traits were broadly consistent, but point estimates for ACO and asthma attenuated  
347 substantially when using the MR-Egger and weighted median approaches (albeit estimates were still  
348 consistent with a harmful effect of raised eosinophils). This suggests there were SNPs with  
349 pleiotropic associations, e.g. SNPs associated with asthma and ACO via pathways other than  
350 eosinophils, which is a known challenge in MR studies (see also **Box 1**).

351 Since many of the SNPs used as IVs for eosinophil count are also associated with other cell counts,<sup>14</sup>  
352 we performed multivariable MR to estimate the influence of multiple cell types simultaneously, after  
353 conditioning on the effects of the SNPs on other cell types. Whilst such an analysis has previously  
354 been undertaken for asthma,<sup>14</sup> we also performed multivariable MR analyses for FEV<sub>1</sub>, FEV<sub>1</sub>/FVC,  
355 asthma and ACO. Whilst we did not find substantial evidence for a harmful effect of neutrophils on  
356 asthma, nor a protective effect of monocytes and lymphocytes, as reported by Astle *et al.*,<sup>14</sup> the  
357 effect directions in our multivariable MR analysis were consistent with those of this previous study  
358 for neutrophils, monocytes and lymphocytes. In multivariable MR analyses, we observed a larger  
359 effect of eosinophils on asthma than reported previously: this could be because our SNP-outcome  
360 dataset was of moderate-to-severe asthma, and around half of the cases and the majority of  
361 controls were also included in the exposure GWAS. Nevertheless, the univariable MR estimates from  
362 MR-Egger regression and weighted median estimation were consistent with the previous estimate  
363 reported for asthma in multivariable analysis by Astle *et al.*<sup>14</sup>

364 In comparison with the harmful effect of eosinophils on FEV<sub>1</sub>/FVC, we did not observe a harmful  
365 effect of neutrophils on FEV<sub>1</sub>/FVC, despite the known relationship between neutrophilia and COPD.<sup>30</sup>  
366 This could be due to lower power of the neutrophil IVs compared to the eosinophil IVs  
367 (**Supplementary Table 3**), but it is also possible that neutrophilic inflammation is more of a  
368 consequence than a cause of reduced FEV<sub>1</sub>/FVC, for example in response to infection,<sup>31</sup> and  
369 therefore may represent a marker of disease progression. There was very weak evidence for a  
370 harmful effect of neutrophils on ACO. Whilst we did not find strong evidence for causality of  
371 eosinophils on AECOPD and respiratory infections, point estimates were consistent with a harmful  
372 effect on AECOPD, and may have been limited by power. The effects of anti-IL5 drugs that have been  
373 attributed to the reduction of eosinophils have been noted to be smaller in acute exacerbations of  
374 COPD compared to asthma.<sup>3,32</sup>

375 Key strengths of the study are that we carried out two-sample analyses with differing sensitivities to  
376 underlying assumptions (including MR-Egger and weighted median analysis). We used the largest  
377 GWAS dataset available for eosinophil count together with multiple large GWASs of lung function  
378 and respiratory disease. In addition to the advantages of valid MR analyses in mitigating against

379 some key limitations of observational epidemiology (reverse causality and confounding), using  
380 genetic proxies for eosinophils may provide a better estimate for long-term eosinophilia, which may  
381 be useful, since one-off assays of cell counts may show a degree of lability.<sup>33</sup> Another strength of our  
382 work is that we undertook multivariable MR analyses to investigate causality between multiple cell  
383 types and the outcomes studied, whilst controlling for the effects of IVs that may have had  
384 pleiotropic effects via other cell types.

385 We acknowledge several limitations. We did not have post-bronchodilator measures of spirometry  
386 available. However, our criterion for defining asthma-COPD overlap required a % predicted FEV1 of  
387 less than 80% (consistent with a spirometric definition of GOLD Stage 2-4 COPD); using the same  
388 pre-bronchodilator spirometry definition of COPD we have previously shown a positive predictive  
389 value of 98% for diagnosis of postbronchodilation-defined COPD.<sup>34</sup> Sample overlap between the  
390 SNP-eosinophil and SNP-outcome datasets (all datasets included participants from UK Biobank)  
391 could bias estimates towards the observational eosinophil-outcome association.<sup>20</sup> As a sensitivity  
392 analysis, we repeated the univariable lung function MR analysis of eosinophils using SNP-lung  
393 function results from the SpiroMeta consortium (i.e. omitting UK Biobank), and found a consistent  
394 IVW estimate. Nevertheless, we acknowledge that our analyses of other outcomes (particularly the  
395 asthma analysis) could be vulnerable to a degree of non-conservative bias.<sup>19,20</sup> The results of our MR  
396 analyses also use genome-wide results adjusted for covariates, and therefore may be susceptible to  
397 collider bias.<sup>19</sup> For the binary phenotypes of asthma, AECOPD and respiratory infections, there may  
398 also have been bias due to misclassification in electronic healthcare records, which we would expect  
399 to be non-differential, and therefore towards the null. There is also potential bias in the causal  
400 estimates for binary outcomes due to non-collapsibility of the odds ratio.<sup>21</sup> Our analyses do not  
401 consider the possibility of non-linear effects between eosinophil counts and lung function, which  
402 have been observed: the results presented are the average difference in lung function if eosinophils  
403 were increased by the same amount for every individual in the population. Finally, we acknowledge  
404 that the multivariable analyses may still be vulnerable to residual pleiotropy via pathways other than  
405 the eight cell types studied. However, we argue that the sensitivity analyses undertaken together  
406 support a causal role for eosinophils in the traits studied. The significant heterogeneity in SNP-  
407 specific causal estimates may arise from pleiotropy. A specific genetic variant influencing eosinophils  
408 may have a greater or lesser effect on these respiratory phenotypes than the direct effect of  
409 eosinophils, possibly in the opposing direction.

410 Our work provides insight into the role of eosinophils in causing respiratory conditions characterised  
411 by airflow obstruction. At present, treatment with the anti-IL5 agents mepolizumab and  
412 benralizumab in asthma is initiated according to levels of eosinophil counts,<sup>9</sup> yet it is possible that a

413 more proximal factor, potentially such as IL5 itself, may be an even better predictor of drug  
414 response. Future work could seek therefore to identify whether particular pathways upstream of  
415 eosinophil counts might help design better methods for deciding upon treatment initiation.

416 To conclude, we found new evidence for a causal effect of eosinophils on ACO, FEV<sub>1</sub>, and FEV<sub>1</sub>/FVC,  
417 as well as reproducing a previous association with asthma. Taken together, our findings support  
418 eosinophils being important causal determinants of airflow obstruction, and suggest that the  
419 strongest causal effects of eosinophils are in people with a history of reversible airflow obstruction,  
420 including the patient group with features of both asthma and COPD.

## 421 **URLs**

422 EBI GWAS catalog: [www.ebi.ac.uk/gwas](http://www.ebi.ac.uk/gwas)

423 rAggr: <http://raggr.usc.edu/>

424 'TwoSampleMR' R package documentation: <https://mrcieu.github.io/TwoSampleMR/>

## 425 **Author Contributions**

426 NS, ALG, ATW, CJ, NR, the SpiroMeta consortium, IPH, LVW and MDT were involved in data  
427 collection, by generating GWAS data of the respiratory traits used in these analyses. NAS, FD, IPH  
428 and MDT were involved in data interpretation. IPH and MDT were involved in study design. ALG was  
429 involved in all aspects of the work, performed the analysis and wrote the first draft of the paper,  
430 including all figures and tables. All authors critically reviewed the manuscript and contributed to  
431 data interpretation and draft revision.

## 432 **Ethics committee approval**

433 This research used published summary data from published genome-wide association studies, plus  
434 data from UK Biobank. This particular research was conducted using the UK Biobank Resource under  
435 Application Number 648. UK Biobank has ethical approval from the UK National Health Service (NHS)  
436 National Research Ethics Service (Ref 11/NW/0382).

## 437 **Role of the funding source**

438 ALG is funded by internal fellowships at the University of Leicester from the Wellcome Trust  
439 Institutional Strategic Support Fund (204801/Z/16/Z) and the BHF Accelerator Award  
440 (AA/18/3/34220). CJ holds a Medical Research Council Clinical Research Training Fellowship  
441 (MR/P00167X/1). ATW is funded by a BBSRC CASE studentship with GSK. LVW holds a GSK/British  
442 Lung Foundation Chair in Respiratory Research. MDT is supported by a Wellcome Trust Investigator

443 Award (WT202849/Z/16/Z). MDT and LVW have been supported by the MRC (MR/N011317/1). MDT  
444 and IPH hold NIHR Senior Investigator Awards. The research was also supported by BREATHE — The  
445 Health Data Research Hub for Respiratory Health (MC\_PC\_19004). The research was partially  
446 supported by the NIHR Leicester Biomedical Research Centre and the NIHR Nottingham Biomedical  
447 Research Centre; the views expressed are those of the author(s) and not necessarily those of the  
448 NHS, the NIHR or the Department of Health. The funders had no role in the design of the Mendelian  
449 randomization analyses. ALG and MDT were involved in all stages of study development and  
450 delivery, and MDT had full access to all data in the study and final responsibility for the decision to  
451 submit for publication.

## 452 Acknowledgements

453 We are grateful to Dr William J Astle for his advice. This research used the ALICE and SPECTRE High  
454 Performance Computing Facilities at the University of Leicester. This analysis used summary data  
455 available via the BREATHE Digital Innovation Hub hosted at SAIL databank  
456 (<https://saildatabank.com/>).

## 457 Declaration of Interests

458 MDT and LVW receive funding from GSK for collaborative research projects outside of the submitted  
459 work. IPH has funded research collaborations with GSK, Boehringer Ingelheim and Orion.

## 460 Data sharing statement

461 This manuscript uses summary-level GWAS data. Lung function GWAS summary statistics as well as  
462 the blood cell GWAS summary statistics are available from the EBI GWAS catalog  
463 (<https://www.ebi.ac.uk/gwas/>). Other GWAS summary statistics are available from the authors on  
464 request.

## 465 References

- 466 1. Davey Smith, G. & Hemani, G. Mendelian randomization: genetic anchors for causal  
467 inference in epidemiological studies. *Hum Mol Genet* **23**, R89-98 (2014).
- 468 2. George, L. & Brightling, C.E. Eosinophilic airway inflammation: role in asthma and chronic  
469 obstructive pulmonary disease. *Thorax* **71**, 34-51 (2016).
- 470 3. Ortega, H.G. *et al.* Severe eosinophilic asthma treated with mepolizumab stratified by  
471 baseline eosinophil thresholds: a secondary analysis of the DREAM and MENSA studies.  
472 *Lancet Respir Med* **4**, 549-556 (2016).
- 473 4. Pavord, I.D. *et al.* Mepolizumab for Eosinophilic Chronic Obstructive Pulmonary Disease. *N*  
474 *Engl J Med* **377**, 1613-1629 (2017).
- 475 5. Eltboli, O. & Brightling, C.E. Eosinophils as diagnostic tools in chronic lung disease. *Expert Rev*  
476 *Respir Med* **7**, 33-42 (2013).
- 477 6. Saetta, M. *et al.* Airway eosinophilia in chronic bronchitis during exacerbations. *Am J Respir*  
478 *Crit Care Med* **150**, 1646-52 (1994).
- 479 7. Pavord, I.D. *et al.* Mepolizumab for severe eosinophilic asthma (DREAM): a multicentre,  
480 double-blind, placebo-controlled trial. *Lancet* **380**, 651-9 (2012).
- 481 8. Haldar, P. *et al.* Mepolizumab and exacerbations of refractory eosinophilic asthma. *N Engl J*  
482 *Med* **360**, 973-84 (2009).

- 483 9. National Institute for Health and Care Excellence. Mepolizumab for treating severe  
484 refractory eosinophilic asthma. Technology appraisal guidance [TA431]. (2017).
- 485 10. U.S. Food and Drug Administration (FDA). Drug Trials Snapshots: NUCAA. (2016).
- 486 11. U.S. Food and Drug Administration (FDA). Drug Trials Snapshots: FASENRA. (2017).
- 487 12. European Medicines Agency. Nucala (mepolizumab). (European Medicines Agency,  
488 Amsterdam, 2019).
- 489 13. European Medicines Agency. Fasenra (benralizumab). (European Medicines Agency,  
490 Amsterdam, 2019).
- 491 14. Astle, W.J. *et al.* The Allelic Landscape of Human Blood Cell Trait Variation and Links to  
492 Common Complex Disease. *Cell* **167**, 1415-1429 e19 (2016).
- 493 15. Hancox, R.J., Pavord, I.D. & Sears, M.R. Associations between blood eosinophils and decline  
494 in lung function among adults with and without asthma. *Eur Respir J* **51**(2018).
- 495 16. Amini, M. *et al.* Blood Eosinophil Count and Metabolic, Cardiac and Pulmonary Outcomes: A  
496 Mendelian Randomization Study. *Twin Res Hum Genet* **21**, 89-100 (2018).
- 497 17. Sakornsakolpat, P. *et al.* Genetic landscape of chronic obstructive pulmonary disease  
498 identifies heterogeneous cell-type and phenotype associations. *Nat Genet* **51**, 494-505  
499 (2019).
- 500 18. Shrine, N. *et al.* New genetic signals for lung function highlight pathways and chronic  
501 obstructive pulmonary disease associations across multiple ancestries. *Nat Genet* **51**, 481-  
502 493 (2019).
- 503 19. Davies, N.M., Holmes, M.V. & Davey Smith, G. Reading Mendelian randomisation studies: a  
504 guide, glossary, and checklist for clinicians. *BMJ* **362**, k601 (2018).
- 505 20. Burgess, S., Davies, N.M. & Thompson, S.G. Bias due to participant overlap in two-sample  
506 Mendelian randomization. *Genet Epidemiol* **40**, 597-608 (2016).
- 507 21. Sheehan, N.A. & Didelez, V. Epidemiology, genetic epidemiology and Mendelian  
508 randomisation: more need than ever to attend to detail. *Hum Genet* **139**, 121-136 (2020).
- 509 22. Bycroft, C. *et al.* The UK Biobank resource with deep phenotyping and genomic data. *Nature*  
510 **562**, 203-209 (2018).
- 511 23. Shrine, N. *et al.* Moderate-to-severe asthma in individuals of European ancestry: a genome-  
512 wide association study. *Lancet Respir Med* **7**, 20-34 (2019).
- 513 24. Bowden, J., Davey Smith, G. & Burgess, S. Mendelian randomization with invalid  
514 instruments: effect estimation and bias detection through Egger regression. *Int J Epidemiol*  
515 **44**, 512-25 (2015).

- 516 25. Bowden, J., Davey Smith, G., Haycock, P.C. & Burgess, S. Consistent Estimation in Mendelian  
517 Randomization with Some Invalid Instruments Using a Weighted Median Estimator. *Genet*  
518 *Epidemiol* **40**, 304-14 (2016).
- 519 26. Hemani, G. *et al.* The MR-Base platform supports systematic causal inference across the  
520 human phenome. *eLife* **7**, e34408 (2018).
- 521 27. Burgess, S., Dudbridge, F. & Thompson, S.G. Re: “Multivariable Mendelian Randomization:  
522 The Use of Pleiotropic Genetic Variants to Estimate Causal Effects”. *American Journal of*  
523 *Epidemiology* **181**, 290-291 (2015).
- 524 28. Burgess, S. & Thompson, S.G. Multivariable Mendelian randomization: the use of pleiotropic  
525 genetic variants to estimate causal effects. *Am J Epidemiol* **181**, 251-60 (2015).
- 526 29. Global Initiative for Chronic Obstructive Lung Disease, I. Global Strategy for the Diagnosis,  
527 Management, and Prevention of Chronic Obstructive Pulmonary Disease (2020 Report).  
528 (2020).
- 529 30. Quint, J.K. & Wedzicha, J.A. The neutrophil in chronic obstructive pulmonary disease. *J*  
530 *Allergy Clin Immunol* **119**, 1065-71 (2007).
- 531 31. Jasper, A.E., McIver, W.J., Sapey, E. & Walton, G.M. Understanding the role of neutrophils in  
532 chronic inflammatory airway disease. *F1000Res* **8**(2019).
- 533 32. Brightling, C. & Greening, N. Airway inflammation in COPD: progress to precision medicine.  
534 *Eur Respir J* **54**(2019).
- 535 33. Shah, A.D. *et al.* White cell count in the normal range and short-term and long-term  
536 mortality: international comparisons of electronic health record cohorts in England and New  
537 Zealand. *BMJ Open* **7**(2017).
- 538 34. Soler Artigas, M. *et al.* Genome-wide association and large-scale follow up identifies 16 new  
539 loci influencing lung function. *Nat Genet* **43**, 1082-90 (2011).

540

541
